# Supplementary material for: Combination of PD-L1 and PVR determines sensitivity to PD-1 blockade
Source: JCI journal article supplement (doi:10.1172/jci.insight.128633), 2020-06-18
Supplement: sd1 [file 1]

# 1 Supplementary Materials

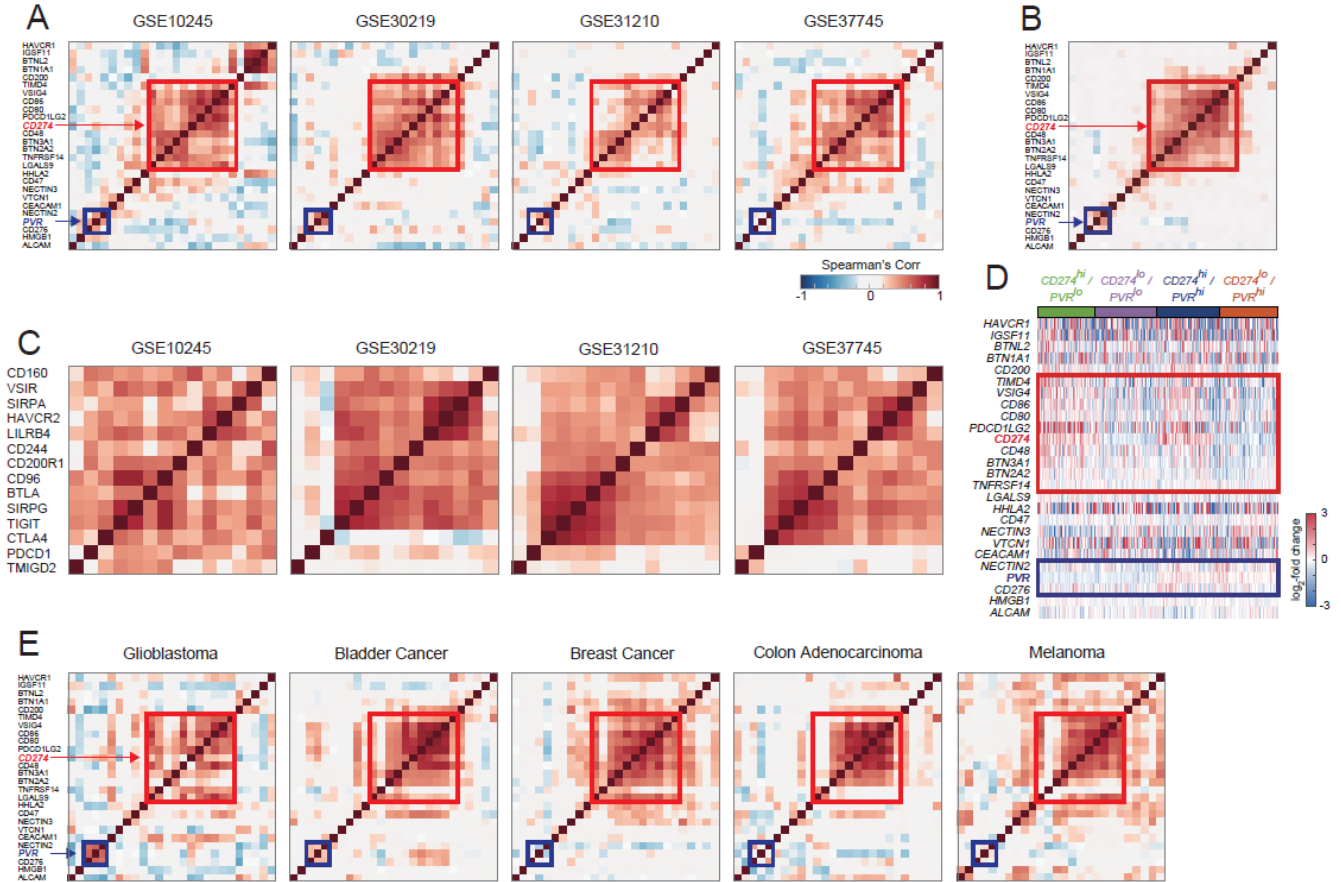

2

3 **Figure S1. Co-expression patterns of ICLs and ICRs in various cancers.** (A)-(C), Correlation patterns  
 4 of ICLs (A) and ICRs (C) in gene expression omnibus database (GSE10245, GSE30219, GSE31210, and  
 5 GSE37745), and representative correlation pattern of ICLs in lung adenocarcinoma datasets (B). The heat  
 6 maps show the Spearman's correlation coefficients of all the pairs of ICLs (or ICRs) in the order of the  
 7 ICLs (or ICRs) determined from hierarchical clustering in Fig. 1A (or 1B). In each heat map, the red and  
 8 blue colors represent the positive and negative correlations among the ICLs or ICRs. The red and blue  
 9 branches in the dendrogram represent the PD-L1 (CD274, red box) and PVR (blue box) clusters,  
 10 respectively. (D), Gene expression patterns of the ICLs in four patient groups ( $CD274^{hi}/PVR^{lo}$ ,  
 11  $CD274^{lo}/PVR^{lo}$ ,  $CD274^{hi}/PVR^{hi}$  and  $CD274^{lo}/PVR^{hi}$ ) in the GSE31210 dataset. Red and blue colors  
 12 represent increased and decreased expression levels of each ICL, respectively, with respect to its median  
 13 expression level. The color bar denotes the gradient of log<sub>2</sub>-fold-changes of expression levels in individual  
 14 samples with respect to its median expression level. (E), Correlation patterns of 27 ICLs in five TCGA  
 15 major cancers: glioblastoma, bladder, and breast cancer, colon adenocarcinoma, and melanoma.

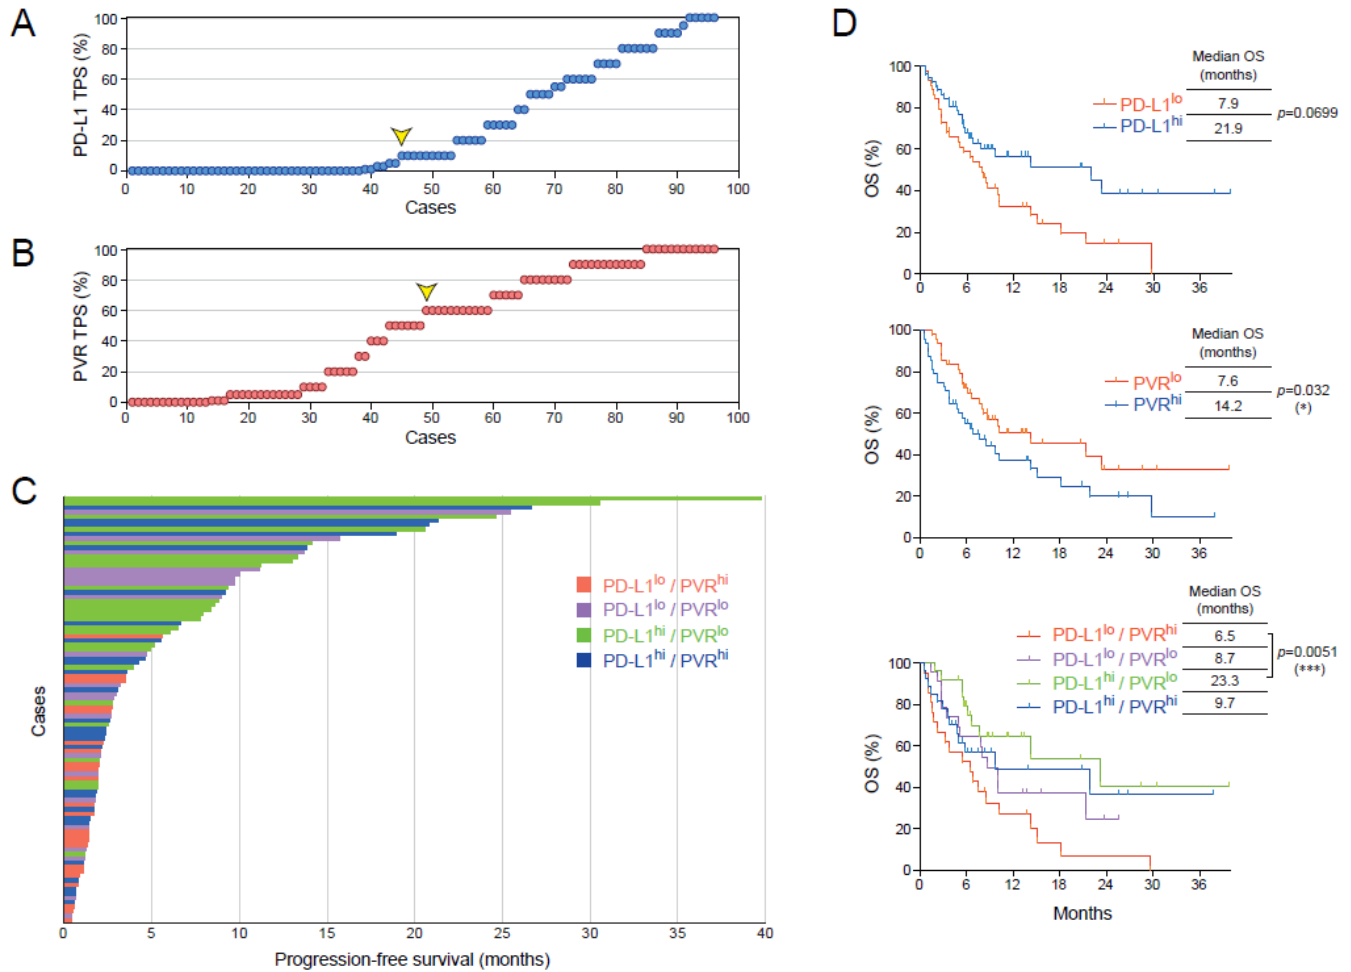

16

17 **Figure S2. Low PVR expression enriches responders to PD-1 blockade when combined with PD-L1**  
 18 **expression in 96 NSCLC patients of discovery cohort.** (A) and (B), Distribution of PD-L1 (A) and PVR  
 19 (B) TPS of each tumor from individual patients with NSCLC, assessed by IHC staining. (C), Swimmer  
 20 plot depicting the PFS of individual NSCLC patients enrolled in anti-PD-1 therapy. (D), Kaplan-Meier  
 21 plots of overall survival (OS) by PD-L1 or/and PVR expression above or below the median for anti-PD-1  
 22 therapy. \* $p < 0.05$ ; \*\*\* $p < 0.001$  by multivariate Wilcoxon with multiple comparison test for four groups  
 23 of survival time.

24

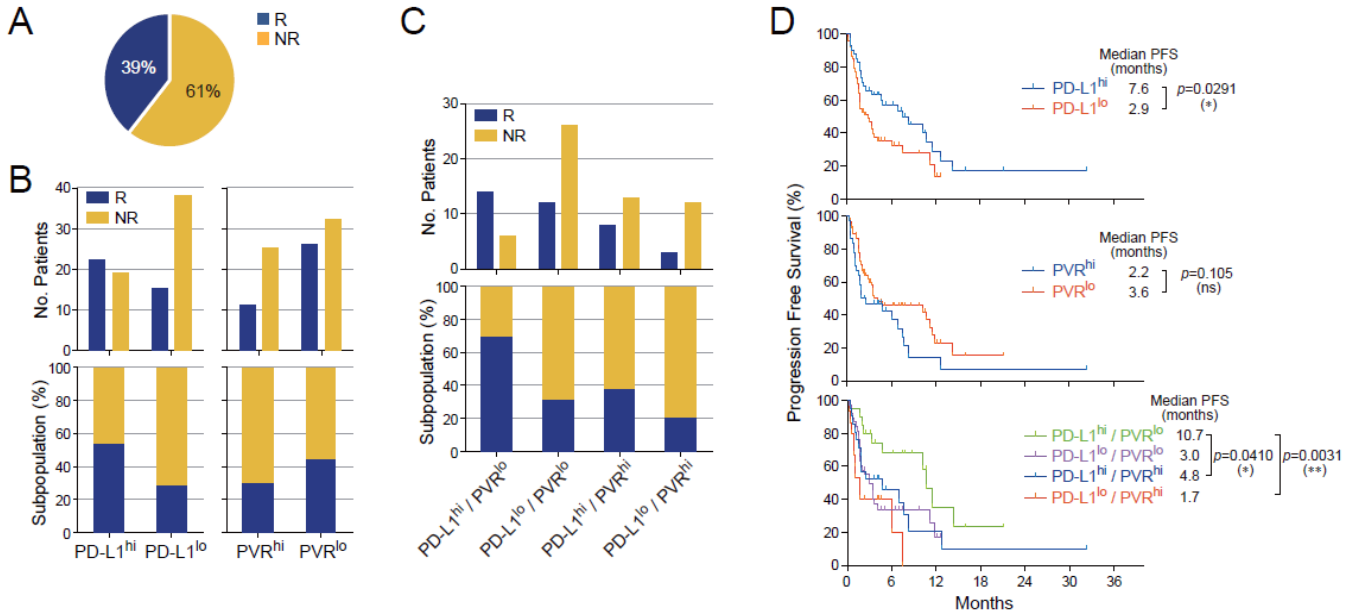

25

26 **Figure S3. Combinatorial expression pattern of PD-L1 and PVR predicts responders to PD-1**  
 27 **blockade with a better accuracy than PD-L1 expression alone in 94 NSCLC patients of validation**  
 28 **cohort. (A), Pie chart depicting the overall objective response rate (ORR) of 94 NSCLC patients enrolled**  
 29 **in PD-1 blockade. (B) and (C), Number of responding or non-responding patients for PD-1 blockade by**  
 30 **PD-L1 or/and PVR above or below the median and ORR calculated by the number of responding or non-**  
 31 **responding patients. Blue, responders (R). Yellow, non-responders (NR). (D), Kaplan-Meier plots of**  
 32 **progression-free survival (PFS) by PD-L1 or/and PVR expression above or below the median for PD-1**  
 33 **blockade. \* $p < 0.05$ ; \*\* $p < 0.01$  by multivariate Wilcoxon with multiple comparison test for four groups**  
 34 **of survival time.**

35

36

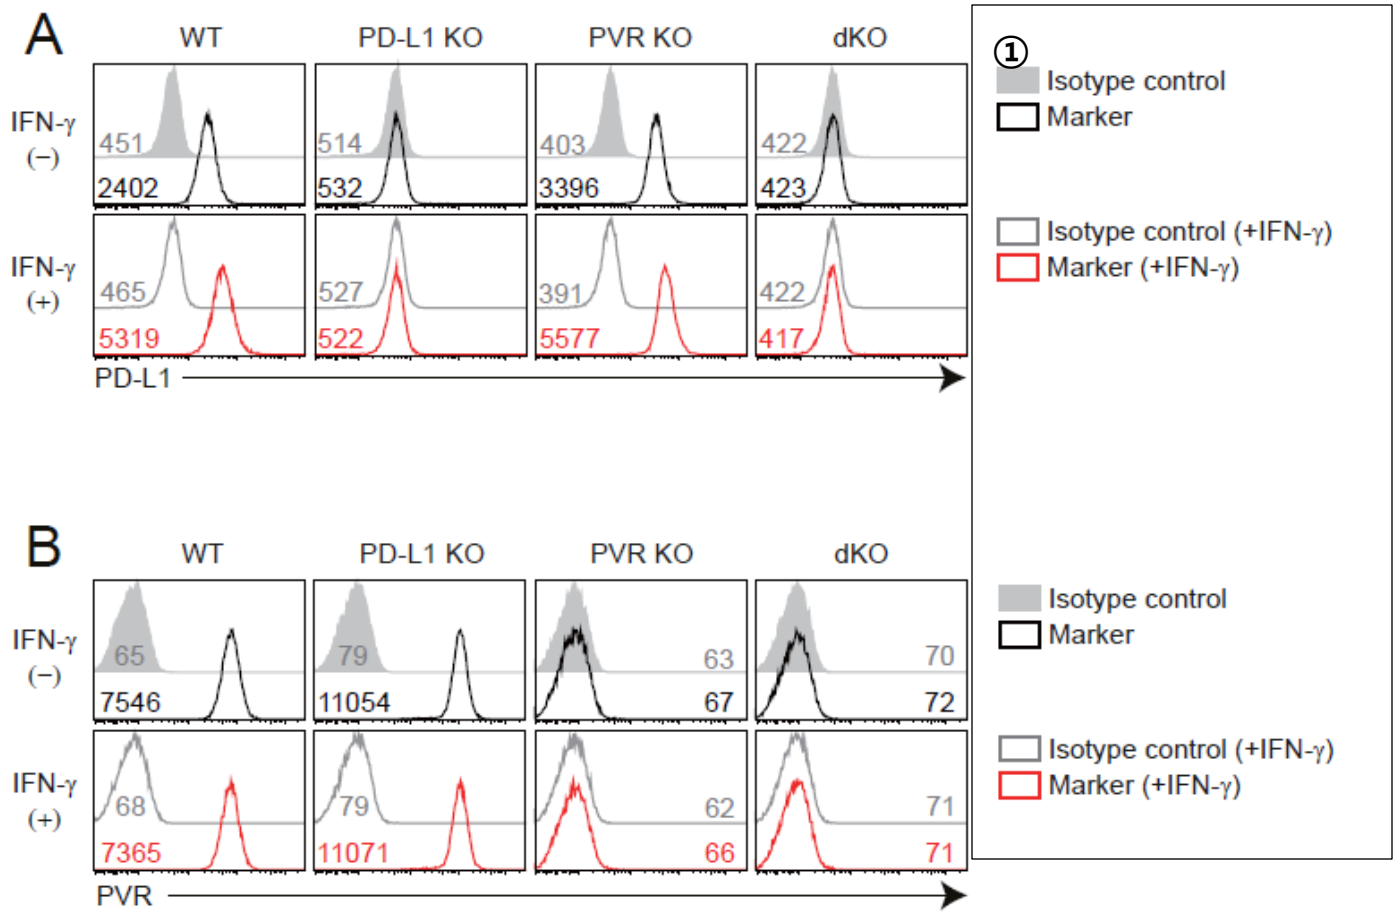

37

38 **Figure S4. IFN- $\gamma$  responsiveness of KO cell lines.** (A) and (B), The expression of PD-L1 (A) and PVR  
 39 (B) in each KO cell line was determined by flow cytometry. The absence of PD-L1 was confirmed by  
 40 treatment with IFN- $\gamma$  (10 ng/ml) for 24 h. The mean fluorescence intensity (MFI) values of PD-L1 or PVR  
 41 and their isotypes are depicted in the FACS plots. Data are representative of two independent experiments.

42

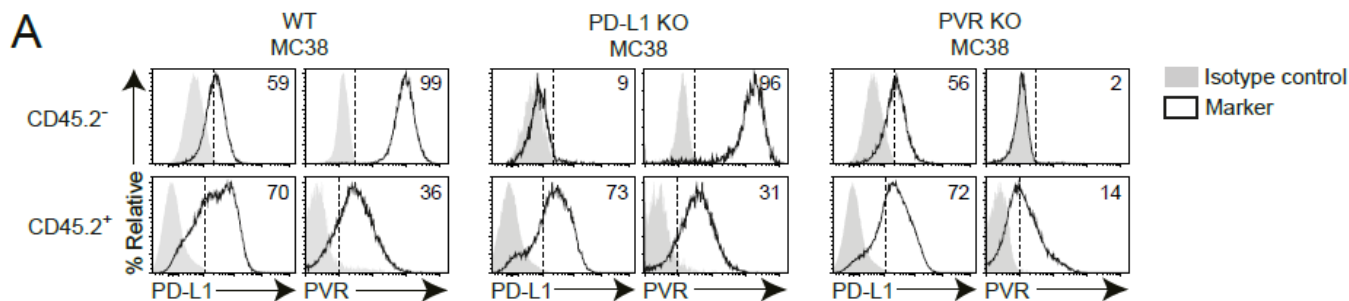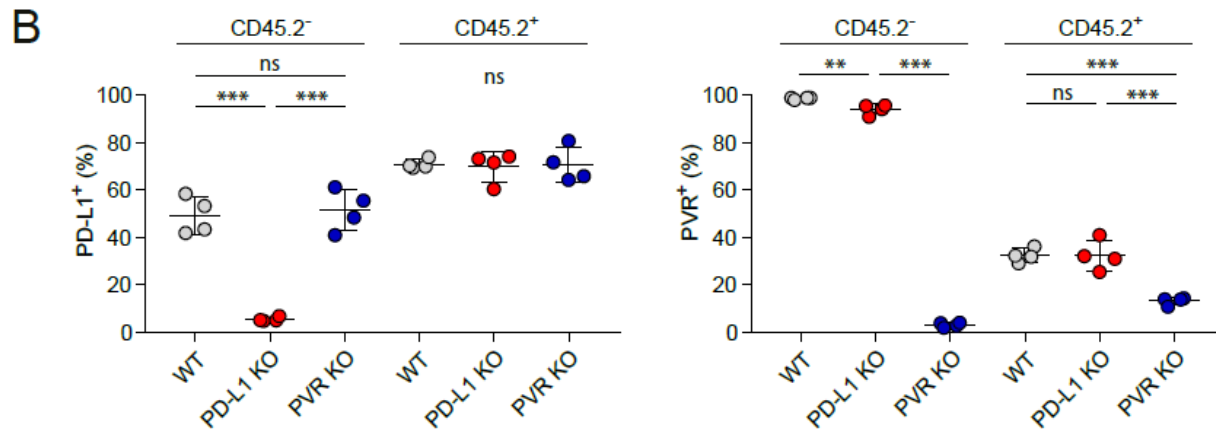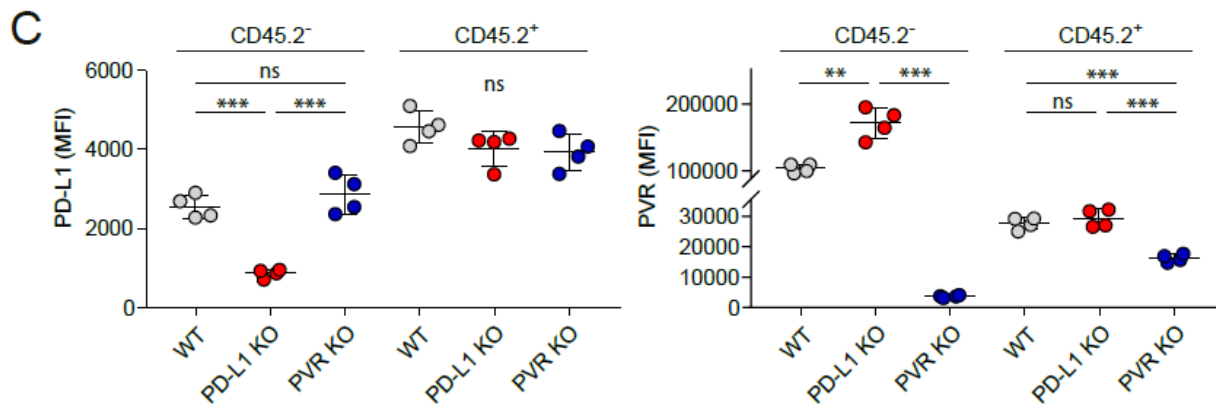

43

44 **Figure S5.** PD-L1 and PVR expression by CD45.2<sup>-</sup> and CD45.2<sup>+</sup> cells in tumor microenvironment. (A)-  
 45 (C), Each tumor was generated by injecting WT, PD-L1 KO, or PVR KO MC38 tumor cells into mice  
 46 ( $n=4$  per group). Once established (100~200 mm<sup>3</sup>), PD-L1 and PVR expressions by CD45.2<sup>-</sup> cells and  
 47 CD45.2<sup>+</sup> cells in each tumor were quantified by flow cytometry. Representative histogram shown with  
 48 mean percentage of expression (A) and proportion of PD-L1 or PVR-expressing cells in CD45.2<sup>-</sup> cells  
 49 and CD45.2<sup>+</sup> cells from each tumor type (B). The MFIs of PD-L1 or PVR-expressing cells were also  
 50 summarized (C). The data are represented as the mean  $\pm$  SEM and are representative of two independent  
 51 experiments. \*\* $p < 0.01$ ; \*\*\* $p < 0.001$  by 1-way ANOVA with Tukey's multiple comparisons test.

52

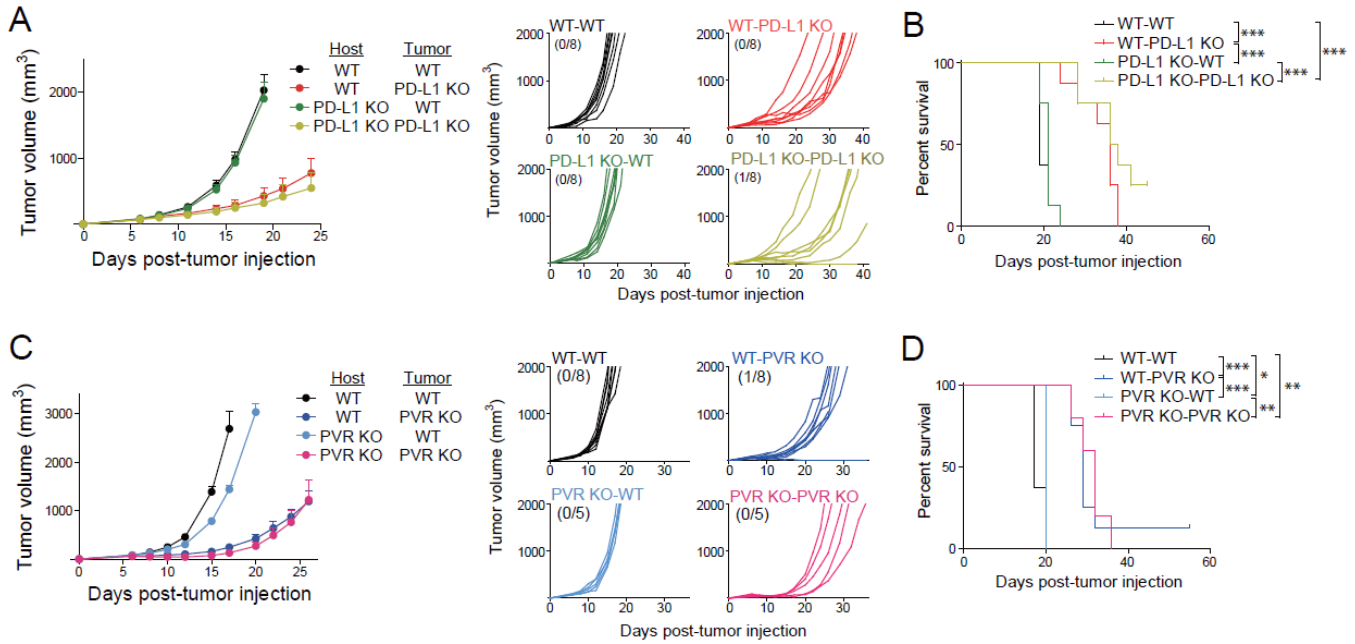

53

54 **Figure S6. Tumor-expressing PVR or PD-L1 is more critical to tumor-immune escape and tumor**  
 55 **progression than host-expressing.** (A) and (B), WT or PD-L1 KO MC38 tumor cells ( $1 \times 10^5$  cells each,  
 56  $n=8$  per group) were subcutaneously injected into WT B6 or PD-L1 KO mice. The tumor growth (A) and  
 57 survival (B) of each tumor-bearing mouse. (C) and (D), WT or PVR KO MC38 tumor cells ( $1 \times 10^5$  cells  
 58 each,  $n=8$  or  $n=5$  per group, as noted in parentheses) were subcutaneously injected into WT B6 or PVR  
 59 KO mice. The tumor growth (C) and survival (D) of each tumor-bearing mouse. The numbers in  
 60 parentheses denote the tumor-free mice/total mice after transplantation. The data are represented as the  
 61 mean  $\pm$  SEM and are representative of two independent experiments.  $*p < 0.05$ ;  $**p < 0.01$ ;  $***p < 0.001$   
 62 by multivariate Wilcoxon with multiple comparison test for four groups of survival time.

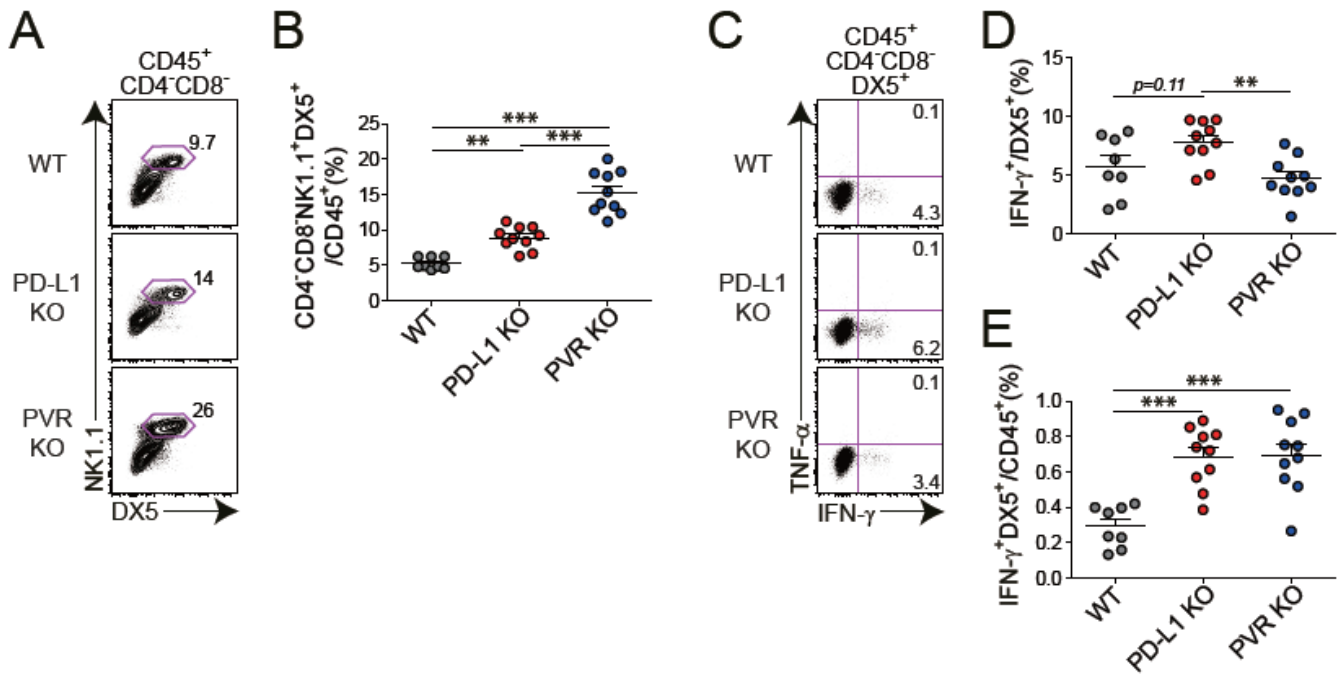

63

64 **Figure S7. PVR and PD-L1 modulates NK cells in parallel with CD8<sup>+</sup> T cells in tumor immune**  
 65 **microenvironment.** Once established (100~200 mm<sup>3</sup>), each tumor harvested from WT (black,  $n=8$ ), PD-  
 66 L1 KO (red,  $n=10$ ), or PVR KO (blue,  $n=10$ ) MC38-bearing mice was analyzed by flow cytometry. NK  
 67 cells were analyzed by flow cytometry in the same experimental condition as Fig. 3D-3L. (A),  
 68 Representative FACS plots of NK cell infiltration in tumors. (B), Frequency of NK cells (CD4-CD8-DX5<sup>+</sup>)  
 69 among CD45<sup>+</sup> cells in tumors. (C)-(E), Representative FACS plots (C) and the frequency of IFN- $\gamma$ <sup>+</sup> cells  
 70 among NK cells (D) and IFN- $\gamma$ <sup>+</sup> CD8<sup>+</sup> T cells (E) in each tumor type. The data are represented as the mean  
 71  $\pm$  SEM with each dot indicating one mouse. Data are representative of two independent experiments. \*\* $p$   
 72  $< 0.01$ ; \*\*\* $p < 0.001$  by 1-way ANOVA with Tukey's multiple comparisons test.

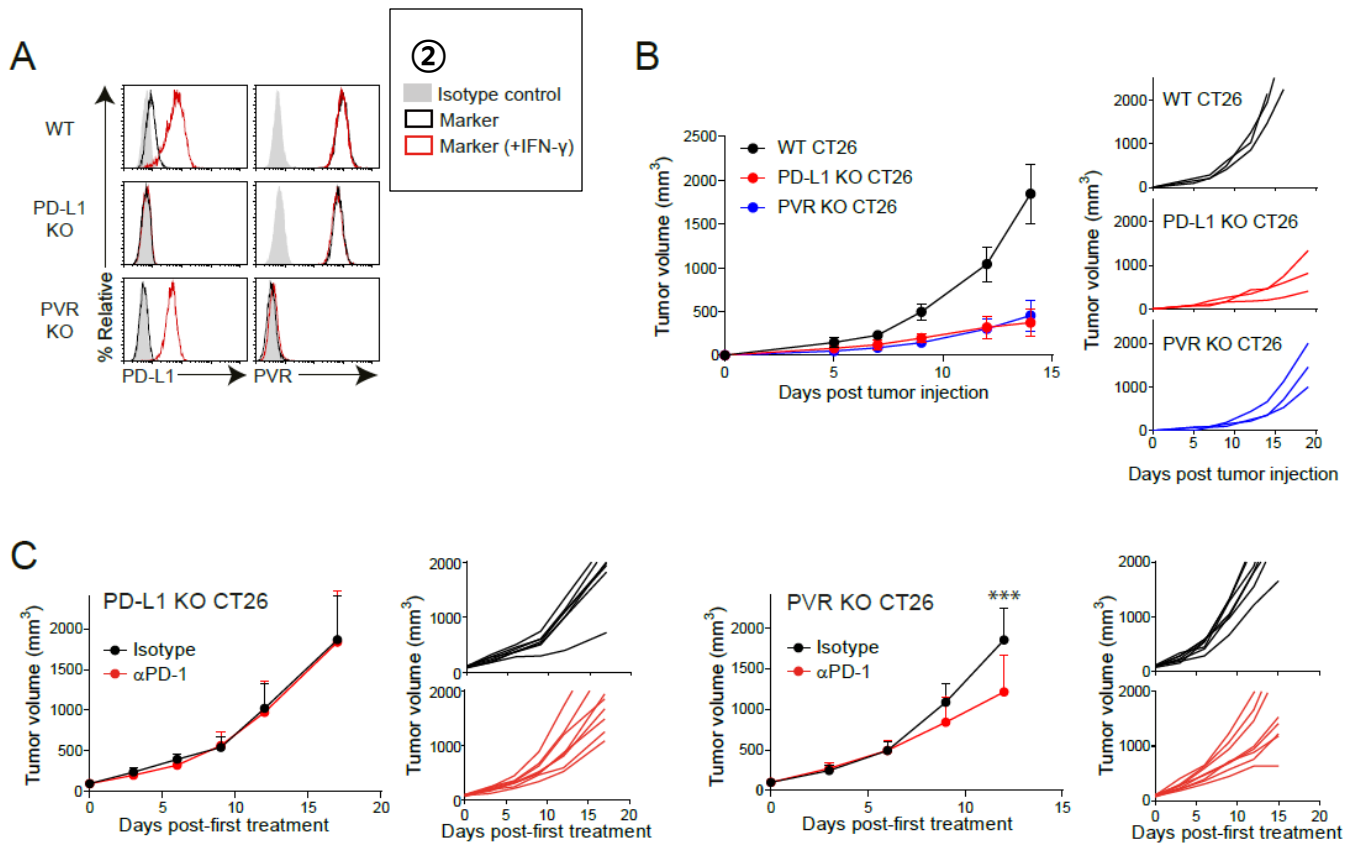

73

74 **Figure S8. Differential sensitivity for PD-1 blockade depending on the expression of PD-L1 and PVR**  
 75 **in CT26 tumor.** (A), PD-L1 KO and PVR KO CT26 tumor cells were generated from parental WT CT26  
 76 using the CRISPR/Cas9 system, and expression of PD-L1 and PVR was assessed by flow cytometry.  
 77 Before analysis, cells were incubated for 24h in the presence (red) or absence (black) of IFN- $\gamma$  (10ng/ml).  
 78 (B), BALB/c mice were injected subcutaneously with WT(black), PD-L1 KO (red), or PVR KO (blue)  
 79 CT26 tumor cells (③+ ( $n=3$  per group)) Tumor sizes were measured at the indicated **time points** (C),  
 80 **Once established (80-120 mm<sup>3</sup>), mice with PD-L1 KO ( $n=8$ ) or PVR KO ( $n=8$ ). (④ →time points.**  
 81 **(C), Once established (80-120 mm<sup>3</sup>), mice with PD-L1 KO ( $n=8$ ) or PVR KO ( $n=8$ )** CT26 tumor were  
 82 treated intraperitoneally with 200  $\mu$ g of isotype control (black) or anti-PD-1 (red) per time (total 5 times,  
 83 every three days). Tumor sizes were measured at the indicated time points after anti-PD-1 therapy. The  
 84 data are represented as the mean  $\pm$  SEM. Data are representative of two independent experiments with  
 85  $n \geq 8$  mice in each experiment. \*\*\* $p < 0.001$  with 2-way ANOVA with Sidak's multiple comparisons test  
 86



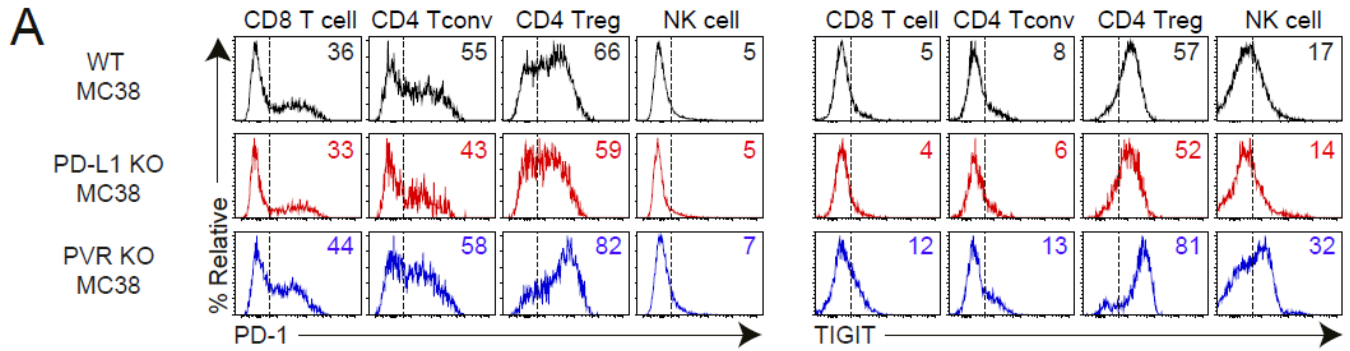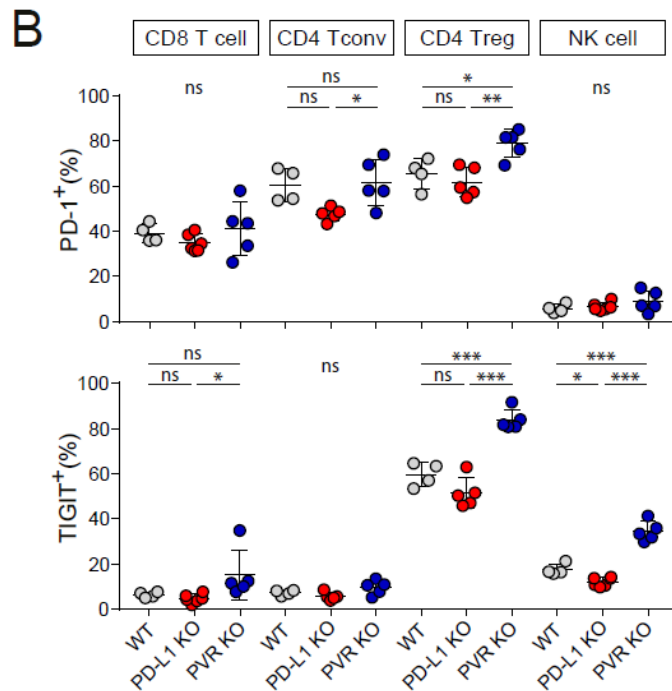

87

88 **Figure S9. PD-1 and TIGIT expression on various subsets of tumor-infiltrating lymphocytes in**  
 89 **tumor microenvironment depending on PD-L1 or PVR expression.** Once established (110~130 mm<sup>3</sup>),  
 90 each tumor harvested from WT (black, *n*=4), PD-L1 KO (red, *n*=5), or PVR KO (blue, *n*=5) MC38-bearing  
 91 mice was analyzed by flow cytometry to quantify the expressions of PD-1 and TIGIT on lymphocytes.  
 92 (A), Representative histogram shown with frequency of PD-1<sup>+</sup> or TIGIT<sup>+</sup> cells in each subset of  
 93 lymphocytes. (B), The data in (A) was summarized as the mean ± SEM with each dot indicating one  
 94 mouse. Data are representative of two independent experiments. \**p* < 0.05; \*\**p* < 0.01; \*\*\**p* < 0.001 by  
 95 1-way ANOVA with Tukey's multiple comparisons test

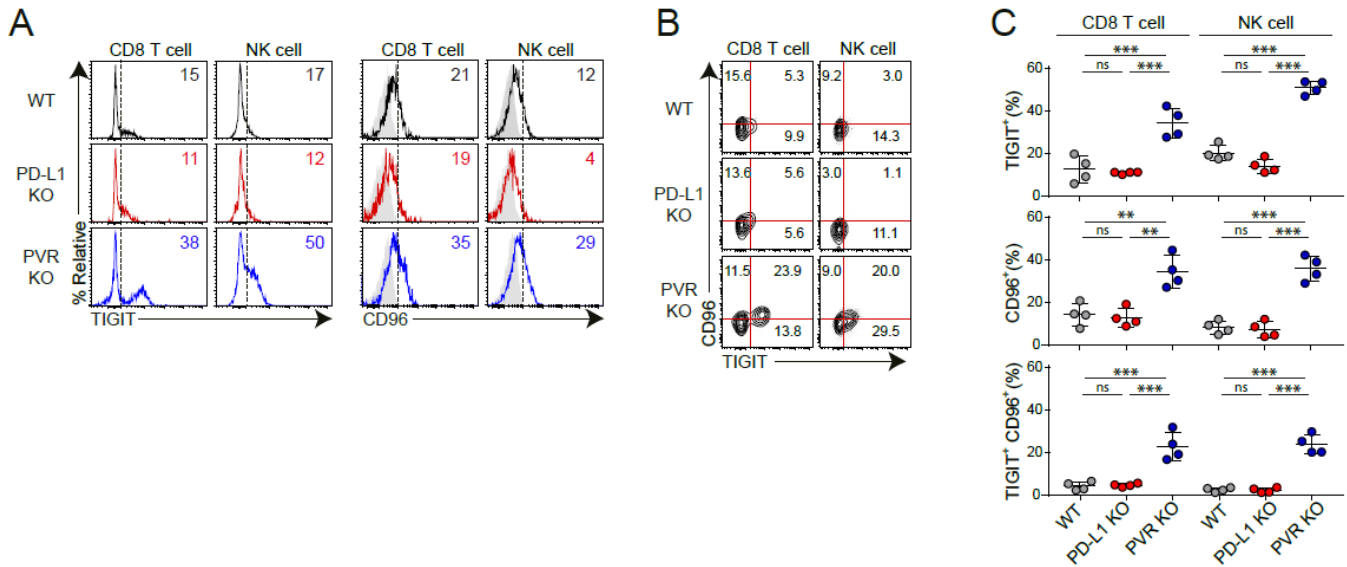

96

97 **Figure S10. TIGIT and CD96 expression are upregulated on PVR KO tumor-infiltrating**  
 98 **lymphocytes.** Once established (140~160 mm<sup>3</sup>), each tumor harvested from WT (black, *n*=4), PD-L1 KO  
 99 (red, *n*=4), or PVR KO (blue, *n*=4) MC38-bearing mice was analyzed by flow cytometry to quantify the  
 100 expressions of TIGIT and CD96 on either CD8<sup>+</sup> T cells or NK cells. (A)-(B), Representative histograms  
 101 and contour plots showing TIGIT<sup>+</sup>, CD96<sup>+</sup>, or TIGIT<sup>+</sup> CD96<sup>+</sup> cells among CD8<sup>+</sup> T cells or NK cells in  
 102 each tumor type. (C), Frequency of TIGIT<sup>+</sup>, CD96<sup>+</sup>, and TIGIT<sup>+</sup> CD96<sup>+</sup> cells among CD8<sup>+</sup> T cells or NK  
 103 cells in each tumor type was summarized as the mean ± SEM with each dot indicating one mouse. Data  
 104 are representative of two independent experiments. \*\**p* < 0.01; \*\*\**p* < 0.001 by 1-way ANOVA with  
 105 Tukey's multiple comparisons test.

106

107  
108

**Table S1. Comparison of baseline patient characteristics between discovery and validation set**

| Variables               | Discovery set (N=96)    | Validation set (N=94)   | P-value |
|-------------------------|-------------------------|-------------------------|---------|
| Age (year)              |                         |                         | 0.774   |
| <65                     | 49 (51%)                | 50 (53.2%)              |         |
| ≥65                     | 47 (49%)                | 44 (46.8%)              |         |
| Gender                  |                         |                         | 0.623   |
| Male                    | 69 (71.9%)              | 71 (75.5%)              |         |
| Female                  | 27 (28.1%)              | 23 (24.5%)              |         |
| Smoking status          |                         |                         | 0.334   |
| Never smoker            | 30 (31.2%)              | 23 (24.5%)              |         |
| Ever smoker             | 66 (68.8%)              | 71 (75.5%)              |         |
| Histology               |                         |                         | 0.880   |
| Adenocarcinoma          | 62 (64.6%)              | 62 (66.0%)              |         |
| Squamous carcinoma      | 34 (35.4%)              | 32 (34.0%)              |         |
| EGFR status             |                         |                         | 0.820   |
| Wild-type               | 86 (89.6%)              | 83 (88.3%)              |         |
| Mutant                  | 10 (10.4%) <sup>Δ</sup> | 11 (11.7%) <sup>Β</sup> |         |
| ALK status              |                         |                         | 0.988   |
| Wild-type               | 95 (99.0%)              | 93 (98.9%)              |         |
| Rearrangement           | 1 (1.0%)                | 1 (1.1%)                |         |
| Immunotherapeutic agent |                         |                         | 0.998   |
| Nivolumab               | 67 (69.8%)              | 68 (72.3%)              |         |
| Pembrolizumab           | 26 (27.1%)              | 23 (24.5%)              |         |
| Atezolizumab            | 3 (3.1%)                | 3 (3.2%)                |         |
| Response to blockade    |                         |                         | 0.765   |
| Responder <sup>c</sup>  | 35 (36.5%)              | 37 (60.6%)              |         |
| Non-responder           | 61 (63.5%)              | 57 (39.4%)              |         |

109  
110  
111  
112  
113  
114  
115

<sup>Δ</sup>EGFR mutant type in discovery set: Exon19deletion (n=5), Exon19deletion/T790M (n=1), Exon 21 L858R (n=4), and Exon18 S768I (n=1)

<sup>Β</sup>EGFR mutant type in validation set: Exon19deletion (n=3), Exon19deletion/T790M (n=3), Exon 21 L858R (n=3), and Exon18 S768I (n=1), Exon20 insertion (n=1)

<sup>c</sup>Responder: The patients who show partial response or stable disease (≥6months)

116  
117

**Table S2. Patient characteristics according to PD-L1/PVR expression in validation set**

| Variables                        | No. of samples | PD-L1/PVR expression |            |            |            | P-value |
|----------------------------------|----------------|----------------------|------------|------------|------------|---------|
|                                  |                | lo/hi                | lo/lo      | hi/lo      | hi/hi      |         |
| <b>Age (year)</b>                |                |                      |            |            |            | 0.190   |
| <65                              | 50 (53.2%)     | 7 (7.4%)             | 21 (22.3%) | 7 (7.4%)   | 15 (16.0%) |         |
| ≥65                              | 44 (46.8%)     | 7 (7.4%)             | 17 (18.1%) | 13 (13.8%) | 7 (7.4%)   |         |
| <b>Gender</b>                    |                |                      |            |            |            | 0.815   |
| Male                             | 71 (75.5%)     | 10 (10.6%)           | 29 (30.9%) | 14 (14.9%) | 18 (19.1%) |         |
| Female                           | 23 (24.5%)     | 4 (4.3%)             | 9 (9.6%)   | 6 (6.4%)   | 4 (4.3%)   |         |
| <b>Smoking status</b>            |                |                      |            |            |            | 0.530   |
| Never smoker                     | 23 (24.5%)     | 3 (3.2%)             | 11 (11.7%) | 6 (6.4%)   | 3 (3.2%)   |         |
| Ever smoker                      | 71 (75.5%)     | 11 (11.7%)           | 27 (28.7%) | 14 (14.9%) | 19 (20.2%) |         |
| <b>Histology</b>                 |                |                      |            |            |            | 0.052   |
| Adenocarcinoma                   | 62 (66.0%)     | 12 (12.8%)           | 24 (25.5%) | 11 (11.7%) | 17 (18.1%) |         |
| Squamous carcinoma               | 32 (34.0%)     | 2 (2.1%)             | 14 (14.9%) | 9 (9.6%)   | 5 (5.3%)   |         |
| <b>EGFR status</b>               |                |                      |            |            |            | 0.665   |
| Wild-type                        | 83 (88.3%)     | 12 (12.8%)           | 35 (37.2%) | 18 (19.1%) | 18 (19.1%) |         |
| Mutant <sup>Δ</sup>              | 11 (11.7%)     | 2 (2.1%)             | 3 (3.2%)   | 2 (2.1%)   | 4 (4.3%)   |         |
| <b>ALK status</b>                |                |                      |            |            |            | 0.685   |
| Wild-type                        | 93 (98.9%)     | 14 (14.9%)           | 37 (39.4%) | 20 (21.3%) | 22 (23.4%) |         |
| Rearrangement                    | 1 (1.1%)       | 0 (0%)               | 1 (1.1%)   | 0 (0%)     | 0 (0%)     |         |
| <b>Immunotherapeutic agent</b>   |                |                      |            |            |            | 0.003   |
| Nivolumab                        | 68 (72.3%)     | 12 (12.8%)           | 34 (36.2%) | 11 (11.7%) | 11 (11.7%) |         |
| Pembrolizumab                    | 23 (24.5%)     | 2 (2.1%)             | 3 (3.2%)   | 7 (7.4%)   | 11 (11.7%) |         |
| Atezolizumab                     | 3 (3.2%)       | 0 (0%)               | 1 (1.1%)   | 2 (2.1%)   | 0 (0%)     |         |
| <b>Response to PD-1 blockade</b> |                |                      |            |            |            | 0.06    |
| Responders <sup>Ⓑ</sup>          | 37 (60.6%)     | 2 (2.1%)             | 12 (12.8%) | 14 (14.9%) | 9 (9.6%)   |         |
| Non-responder                    | 57 (39.4%)     | 12 (12.8%)           | 26 (27.7%) | 6 (6.4%)   | 13 (13.8%) |         |

118  
119  
120  
121  
122

<sup>Δ</sup>EGFR mutant type in validation set: Exon19deletion (n=3), Exon19deletion/T790M (n=3), Exon 21 L858R (n=3), and Exon18 S768I (n=1), Exon20 insertion (n=1)

<sup>Ⓑ</sup>Responder: The patients who show partial response or stable disease (≥6 months)

123  
124  
125

**Table S3. Univariate and multivariate factors affecting the response to anti-PD-1 therapy in validation set**

| Variable                      | Category                  | Univariate survival analysis |             |         | Multivariate survival analysis |              |         |
|-------------------------------|---------------------------|------------------------------|-------------|---------|--------------------------------|--------------|---------|
|                               |                           | HR                           | 95% CI      | P-value | AHR                            | 95% CI       | P-value |
| Age (years)                   | ≥65 vs. <65               | 0.741                        | 0.450-1.219 | 0.238   | 0.833                          | 0.485-1.430  | 0.508   |
| Sex                           | Female vs. male           | 1.872                        | 1.081-3.224 | 0.025   | 2.885                          | 0.632-13.168 | 0.171   |
| Smoking                       | Smoker vs. never smoker   | 0.583                        | 0.338-1.008 | 0.053   | 1.278                          | 0.291-5.615  | 0.746   |
| Histology                     | Squamous vs. non-squamous | 0.691                        | 0.405-1.179 | 0.175   | 1.080                          | 0.580-2.012  | 0.808   |
| EGFR status                   | Mutant vs. wild-type      | 1.420                        | 0.691-2.919 | 0.340   | 0.877                          | 0.347-2.217  | 0.782   |
| Treatment line                | ≥ 3rd line vs. 2nd line   | 1.147                        | 0.690-1.906 | 0.597   | 0.919                          | 0.504-1.675  | 0.781   |
| PD-L1 <sup>Δ</sup>            | ≥10% vs. <10%             | 0.559                        | 0.332-0.940 | 0.028   | 0.512                          | 0.298-0.878  | 0.015   |
| PVR <sup>Δ</sup>              | ≥60% vs. <60%             | 1.568                        | 0.949-2.592 | 0.079   | 1.792                          | 0.995-3.227  | 0.052   |
| PD-L1/PVR status <sup>Δ</sup> | PD-L1+/PVR- vs. others    | 0.771                        | 0.585-1.017 | 0.066   | 0.370                          | 0.182-0.755  | 0.006   |

126  
127  
128  
129

Abbreviations: HR, hazard ratio; AHR, adjusted hazard ratio; CI, confidence interval

<sup>Δ</sup>In multivariate analysis, one factor of PD-L1, PVR, and PD-L1/PVR is included for analysis.
